# Supplementary material for: Electronic communication between fluorescent pyrene excimers and spin crossover complexes in nanocomposite particles
Source: Royal Society of Chemistry journal article supplement (doi:10.1039/c5tc00667h), 2015-01-01
Supplement: c5tc00667h1.pdf [file c5tc00667h1.pdf]

## SUPPORTING INFORMATION

### **Electronic communication between fluorescent pyrene excimers and spin crossover complexes in nanocomposite particles**

Iurii Suleimanov<sup>a,b</sup>, Olena Kraieva<sup>a,c</sup>, José Sanchez Costa<sup>a</sup>, Igor O. Fritsky<sup>b</sup>, Gábor Molnár<sup>a</sup>, Lionel Salmon<sup>\*,a</sup>, and Azzedine Bousseksou<sup>\*,a</sup>

<sup>a</sup>Laboratoire de Chimie de Coordination, CNRS & Université de Toulouse (INPT, UPS),  
31077 Toulouse, France

<sup>b</sup>Department of Chemistry, Taras Shevchenko National University of Kyiv, 01601 Kyiv,  
Ukraine

<sup>c</sup>Kyiv Polytechnic Institute, National Technical University of Ukraine, 03056 Kyiv, Ukraine

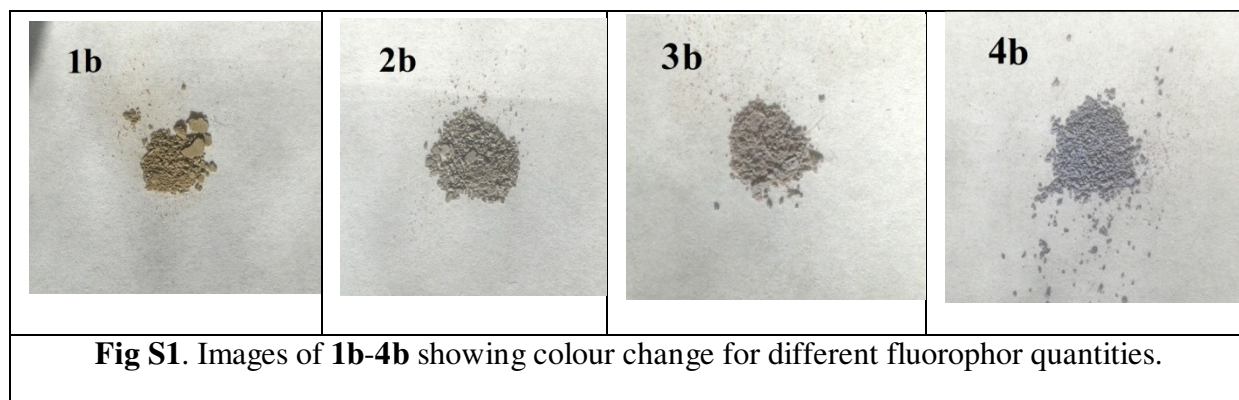

**Table S1: Reagent quantities used to prepare 1a-4a.**

| Samples   | Oil phase (ml) |         |             | Polar phase (ml) | Reagents (mg)                       |        |      | Mean size (nm) |       |
|-----------|----------------|---------|-------------|------------------|-------------------------------------|--------|------|----------------|-------|
|           | Triton         | Hexanol | Cyclohexane | H <sub>2</sub> O | Fe(BF <sub>4</sub> ) <sub>2</sub> * | TEOS** | Htrz | Length         | Width |
| <b>1a</b> | 7.2            | 7.2     | 15          | 2                | 422                                 | 0.2    | 262  | 60             | 40    |
| <b>2a</b> | 7.2            | 7.2     | 30          | 2                | 422                                 | 0.2    | 262  | 110            | 80    |
| <b>3a</b> | 7.2            | 7.2     | 30          | 2                | 422                                 | 0.2    | 262  | 110            | 80    |
| <b>4a</b> | 7.2            | 7.2     | 40          | 2                | 422                                 | 0.2    | 262  | 150            | 90    |

\* hydrated form with six H<sub>2</sub>O molecules

\*\* measured in ml

**Table S2: Fluorophore quantities in 1b-4b.**

| Samples   | Fluorophor quantity found (% mas.) | Fluorophor quantity added (mg/% mas.) |
|-----------|------------------------------------|---------------------------------------|
| <b>1b</b> | 38                                 | 100/50                                |
| <b>2b</b> | 11                                 | 60/37.5                               |
| <b>3b</b> | 4.2                                | 20/16.7                               |
| <b>4b</b> | 1.7                                | 10/9                                  |

**Table S3. C, H, N analysis for 1b-4b.**

| Compound  |       | C / % | H / % | N / % | Calculated Formula                                                                                                                                                                          |
|-----------|-------|-------|-------|-------|---------------------------------------------------------------------------------------------------------------------------------------------------------------------------------------------|
| <b>1b</b> | exptl | 37.53 | 2.97  | 20.43 | [Fe(H-trz) <sub>2</sub> (trz)](BF <sub>4</sub> )·(SiO <sub>2</sub> ) <sub>0.4</sub> (C <sub>20</sub> H <sub>16</sub> NSiO <sub>3</sub> ) <sub>0.72</sub> ·(H <sub>2</sub> O) <sub>1.5</sub> |
|           |       | 37.56 | 2.97  | 20.29 |                                                                                                                                                                                             |
|           | calcd | 37.56 | 3.45  | 20.89 |                                                                                                                                                                                             |
| <b>2b</b> | exptl | 23.85 | 2.11  | 29.13 | [Fe(H-trz) <sub>2</sub> (trz)](BF <sub>4</sub> )·(SiO <sub>2</sub> ) <sub>0.4</sub> (C <sub>20</sub> H <sub>16</sub> NSiO <sub>3</sub> ) <sub>0.14</sub> ·(H <sub>2</sub> O) <sub>1.3</sub> |
|           |       | 23.85 | 2.13  | 29.03 |                                                                                                                                                                                             |
|           | calcd | 23.71 | 2.88  | 28.7  |                                                                                                                                                                                             |
| <b>3b</b> | exptl | 20.71 | 2.06  | 30.48 | [Fe(H-trz) <sub>2</sub> (trz)](BF <sub>4</sub> )·(SiO <sub>2</sub> ) <sub>0.4</sub> (C <sub>20</sub> H <sub>16</sub> NSiO <sub>3</sub> ) <sub>0.05</sub> ·(H <sub>2</sub> O) <sub>1.3</sub> |
|           |       | 20.59 | 2.04  | 30.27 |                                                                                                                                                                                             |
|           | calcd | 20.29 | 2.75  | 30.6  |                                                                                                                                                                                             |
| <b>4b</b> | exptl | 19.09 | 2.0   | 31.70 | [Fe(H-trz) <sub>2</sub> (trz)](BF <sub>4</sub> )·(SiO <sub>2</sub> ) <sub>0.4</sub> (C <sub>20</sub> H <sub>16</sub> NSiO <sub>3</sub> ) <sub>0.02</sub> ·(H <sub>2</sub> O) <sub>1.3</sub> |
|           |       | 19.03 | 1.94  | 31.68 |                                                                                                                                                                                             |
|           | calcd | 19.03 | 2.7   | 31.29 |                                                                                                                                                                                             |

## TEM images and particle size distribution

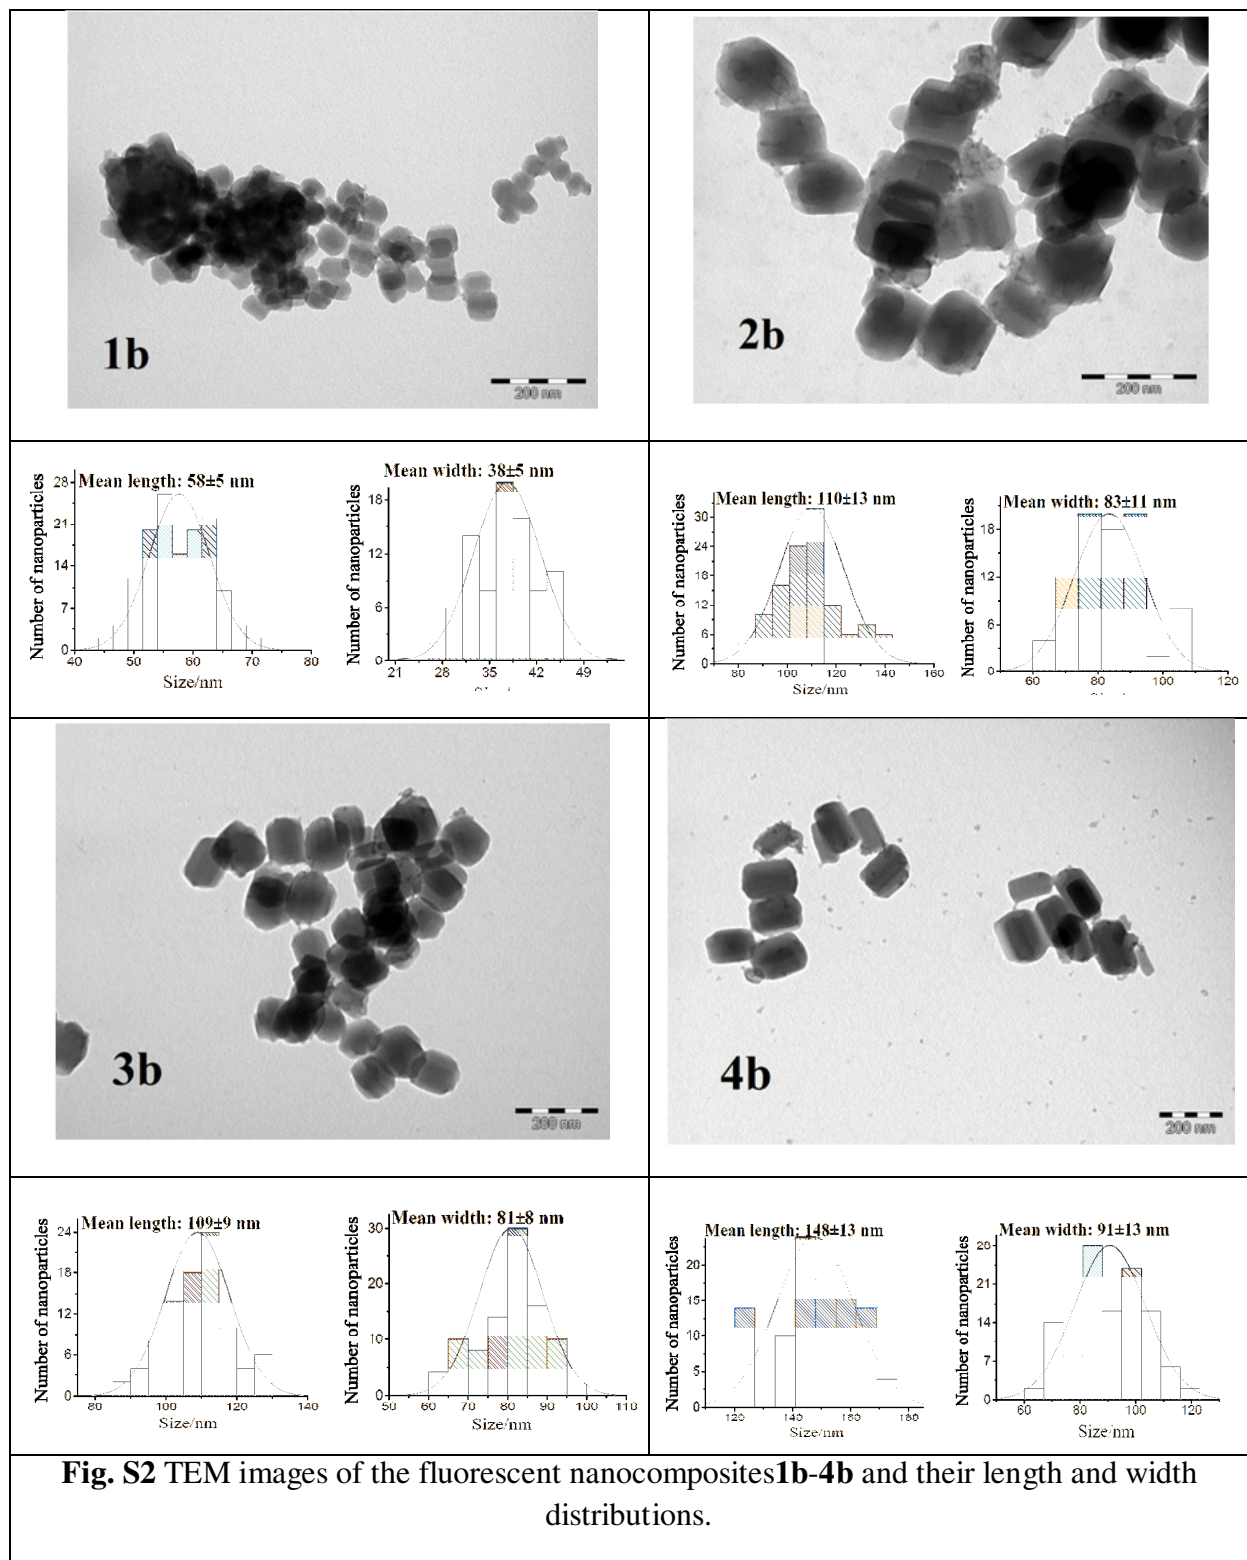

## Infrared spectra

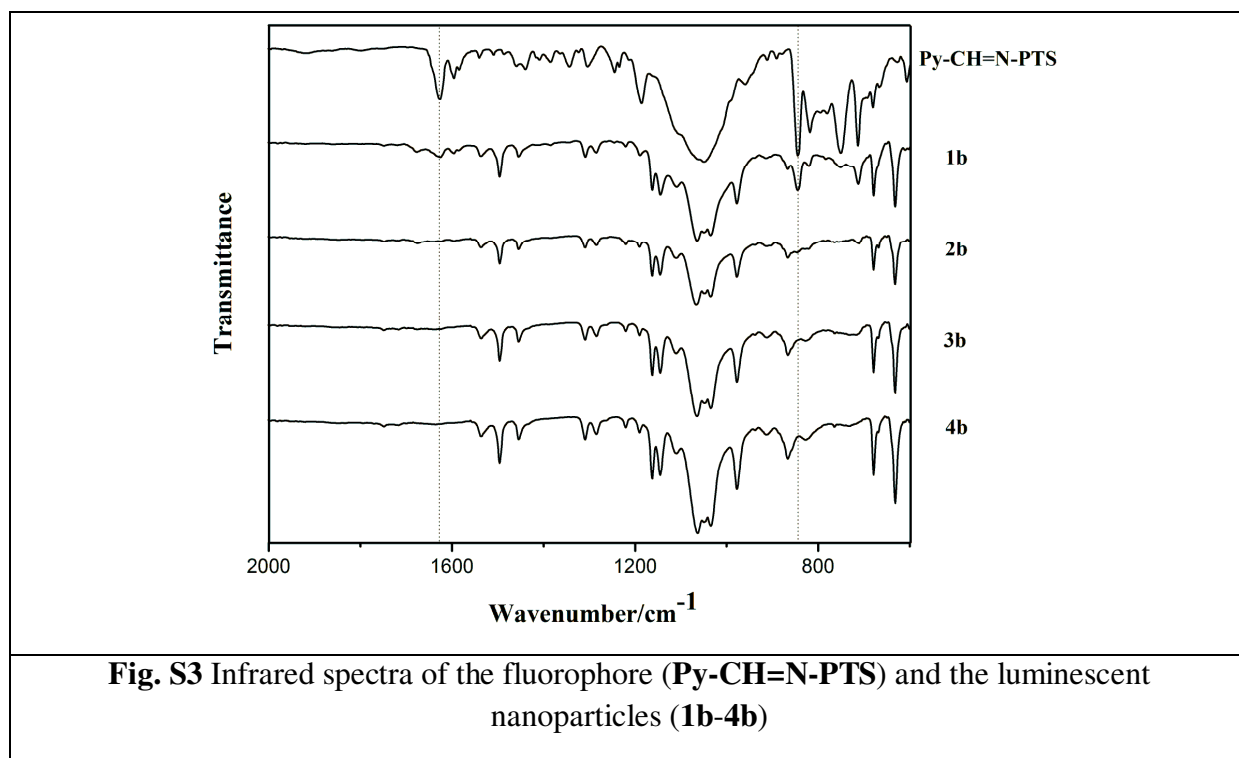

## Magnetic measurements

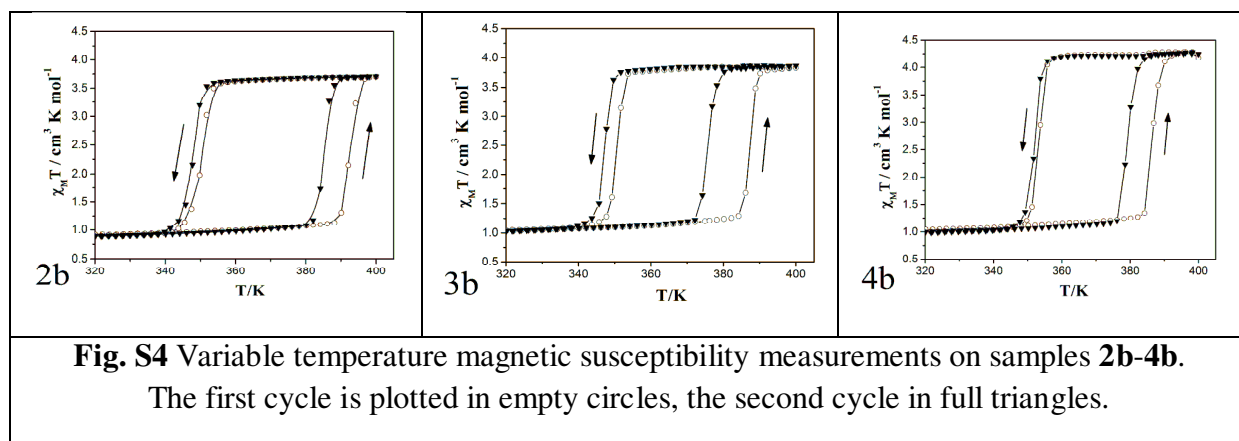

## Fluorescence temperature dependence

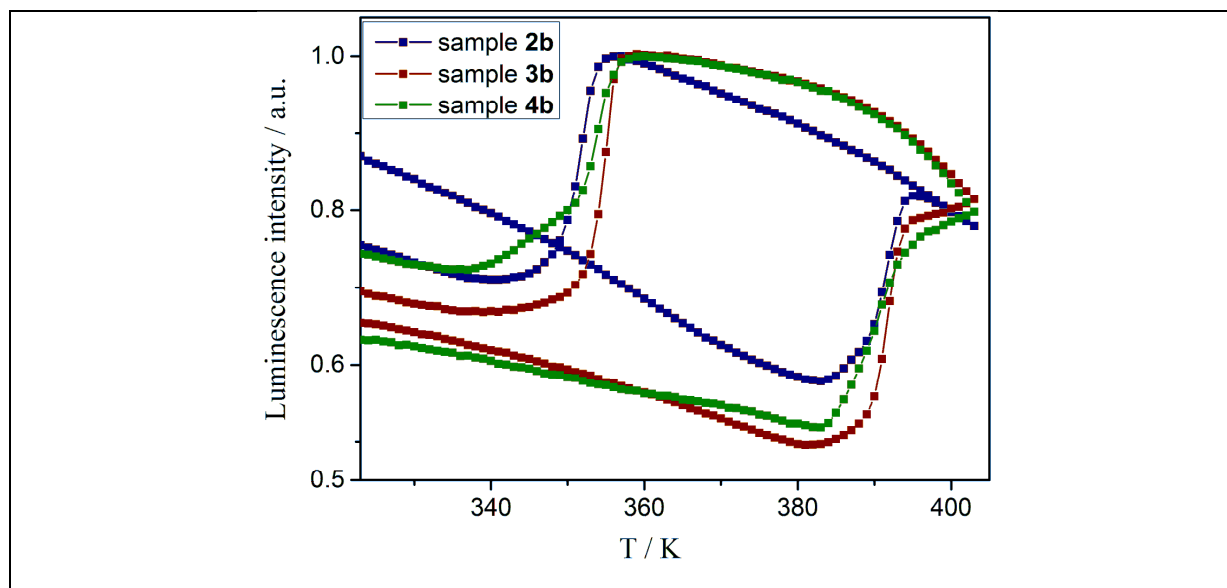

**Fig. S5** Variable temperature luminescence intensity of **2b-4b** ( $\lambda_{\text{exc}} = 450 \text{ nm}$ ,  $\lambda_{\text{em}} = 550 \text{ nm}$ ).

## Luminescence lifetime measurements

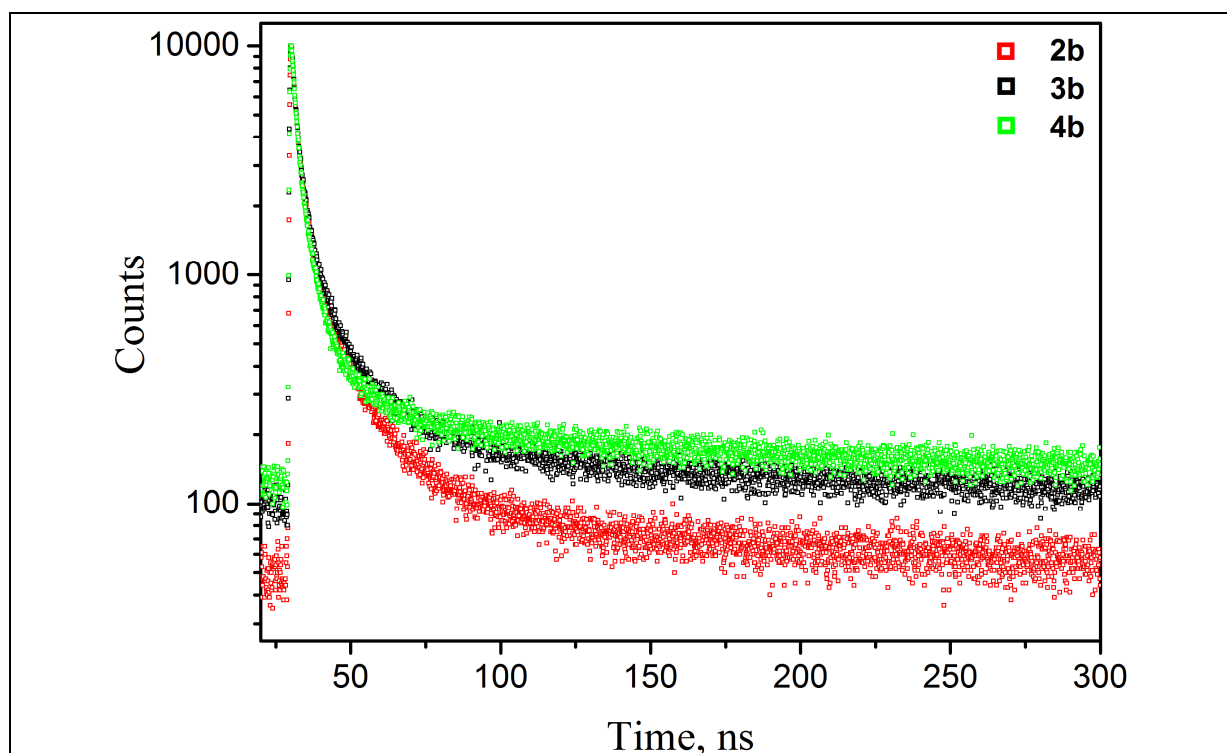

**Fig. S6** Fluorescence decay curves of samples **2b-4b** ( $\lambda_{\text{exc}} = 303 \text{ nm}$ ,  $\lambda_{\text{em}} = 520 \text{ nm}$ )

**Table S4. Comparative table of spin transition temperatures ( $T_{c\uparrow}$ -heating,  $T_{c\downarrow}$ -cooling) measured with different methods**

| Sample <b>1b</b> | Magnetic susceptibility |                   | Optical reflectivity |                   | Fluorescence intensity |                   | Fluorescence lifetime |                   | Fluorescence wavelength* |                   |
|------------------|-------------------------|-------------------|----------------------|-------------------|------------------------|-------------------|-----------------------|-------------------|--------------------------|-------------------|
|                  | $T_{c\uparrow}$         | $T_{c\downarrow}$ | $T_{c\uparrow}$      | $T_{c\downarrow}$ | $T_{c\uparrow}$        | $T_{c\downarrow}$ | $T_{c\uparrow}$       | $T_{c\downarrow}$ | $T_{c\uparrow}$          | $T_{c\downarrow}$ |
| First cycle      | 394                     | 349               | 393                  | 341               | 389                    | 342               | 392                   | 345               | 395                      | 346               |
| Second cycle     | 384                     | 347               | 382                  | 338               | 387                    | 341               | 392                   | 346               | 395                      | 348               |

\*measured for **3b**
